# Supplementary material
Source: HighWire-hosted journal article supplement (https://www.annfammed.org/highwire/filestream/8415/field_highwire_adjunct_files/0/Vedel_Supp_App1-4_Tables_1-5.pdf)
Supplement: Vedel_Supp_App1-4_Tables_1-5.pdf [file Vedel_Supp_App1-4_Tables_1-5.pdf]

## Supplemental materials for:

Khanassov V, Vedel I, Pluye P. Barriers to implementation of case management for patients with dementia: a systematic mixed studies review. *Ann Fam Med*. 2014;12(5):456-465.

## **Supplementary Appendix 1. Methodology and methods**

### **Systematic Mixed Studies Review**

As defined elsewhere by the second author (PP), systematic mixed studies review allows the integration of results from studies with diverse designs (quantitative, qualitative and mixed methods) to evaluate complex interventions.<sup>38</sup> This review applies mixed methods research designs to synthesize results of included studies as it preserves the integrity of the findings across different designs.<sup>1</sup> Including different forms of evidence derived from studies with a variety of types of methodologies and methods produces more relevant research for decision makers, and maximizes the use of review results (knowledge to action) by enhancing their utility and impact.<sup>2</sup> A systematic mixed studies review (i) overcomes the issue of a partial picture that results from relying on one type of research in isolation; (ii) answers a number of questions in the same review (e.g., identification of barriers and evaluation if they have been addressed);<sup>3</sup> and (iii) assists in the critical analysis of interventions from the viewpoint of participants targeted.<sup>2</sup>

The research question of our systematic review was: *for Community-Based Primary Health Care (CBPHC) patients with dementia, what are the relationships between the key outcomes of case management (CM) and barriers to implementation?*

#### **The stages in the systematic review**

As any systematic review, our systematic mixed studies review follows the standards of the PRISMA statement.<sup>4</sup> We thus followed five stages<sup>38, 111</sup> to conduct this systematic review:

##### ***Stage 1. Definition of eligibility criteria***

### Inclusion criteria

*Population:* people of any age and gender with any type of primary causes of dementia (Alzheimer disease, vascular dementia, Pick's disease, Lewy-Body dementia, Parkinson's disease, Huntington's disease)<sup>5</sup> and cognitive impairment. Primary causes of dementia cause irreversible loss of memory without any underlying medical condition (e.g., brain tumour).

*Setting:* CM intervention implemented in a range of community settings such as patients' homes and family physician's offices.<sup>6-8</sup>

*Types of interventions:* CM interventions that comprise all following components: assessment, coordination, monitoring, and delivery of services to meet patients' needs.<sup>15, 39</sup>

*Type of studies:* intervention studies assessing outcomes of CM for patients and caregivers (e.g., randomized controlled trial - RCT); intervention and non-intervention studies evaluating barriers to CM implementation (e.g., qualitative studies). Thus, all types of studies regardless the design were included.

*Types of outcome measures:* *clinical outcomes* (neuropsychiatric and behavioural symptoms, cognition, depression, functional status (ADLs/IADLs), perceived health, quality of life, risk of mortality), *service use* (nursing home, hospital and emergency department admission, length of hospital stay), *caregiver outcomes* (depression, burden, strain, quality of life, perceived health), *satisfaction* (patient-caregiver dyad, health care professionals), *cost-effectiveness*, and *other* outcomes (e.g., dementia detection rate).

### Exclusion criteria

*Population:* secondary causes of dementia or cognitive impairment resulted from an underlying medical condition (e.g., vitamin B<sub>12</sub> deficiency, brain tumor).

*Setting:* interventions conducted in a nursing home, a hospital without link to primary care, an assisted living facility, palliative or respite care, a day care center, a club due to different organizational and professional barriers, which are not directly relevant to primary care. This ensures more homogeneity in the selected studies.

*Type of interventions:* interventions focused on education of healthcare professionals, psycho-education, behavioural therapy, pharmacotherapy of cognitive impairment, performance of cognitive function tests.

### ***Stage 2. Development of an extensive search strategy***

A literature search was conducted by a specialized librarian; publications in English or French listed in MEDLINE, PsycInfo, EMBASE, the Cochrane Database of Systematic Reviews (CDSR) and Database of Abstracts of Reviews of Effects (DARE), and published between 1995 (official publication of the CM Standards of Practice)<sup>6</sup> and August 31, 2012 were searched.

The first search was expanded using snowballing techniques looking at the references in the selected studies and systematic reviews. Moreover, all companion articles of the intervention studies were searched (including articles on intervention implementation). To assure the exhaustiveness of our search we additionally looked for the citations of included studies in the Scopus database. The main key terms used to identify relevant studies were “case management” or “care management” or “case coordination”.

As mentioned, all types of study designs were searched (qualitative, quantitative and mixed methods). The example of search strategy of qualitative studies in PsycINFO is as follows:

- 1 dementia/ or aids dementia complex/ or dementia with lewy bodies/ or presenile dementia/ or semantic dementia/ or senile dementia/ or vascular dementia/  
or alzheimer's disease/ or cognitive impairment/ or corticobasal degeneration/ or creutzfeldt jakob syndrome/ or melas/ or neurodegenerative diseases/ or  
neurofibrillary tangles/ or parkinson's disease/ or picks disease/ or pseudodementia/ or huntington disease/ or senile plaques/ (65226)
- 2 exp Cognitive Impairment/ (17076)
- 3 ((cognit\* adj1 disorder?) or (cognit\* adj1 impairment?)).mp. (26680)
- 4 pick?? disease.mp. (407)
- 5 (dementia? or alzheimer\*).mp. (54468)
- 6 lewy body.mp. (865)
- 7 1 or 2 or 3 or 4 or 5 or 6 (80911)
- 8 case management/ or care management/ or care coordination or (case adj manag?).mp. (2310)
- 9 limit 8 to ("qualitative (maximizes sensitivity)" and (english or french) and human and yr="1990 -Current") (508)
- 10 7 and 9 (9)
- 11 "Qualitative Study".md. (89802)
- 12 8 and 11 (118)
- 13 exp qualitative research/ or exp grounded theory/ or exp interviews/ (11273)
- 14 exp Quasi Experimental Methods/ (69)
- 15 (research adj action).mp. (102)
- 16 exp questionnaires/ (10367)
- 17 (participatory adj research??).mp. (1022)
- 18 (grounded adj theor???)mp. (7278)

- 19 (quasi adj experimental).mp. (4551)
- 20 (questionnaire? or interview\* or qualitative?).mp. (373594)
- 21 11 or 13 or 14 or 15 or 16 or 17 or 18 or 19 or 20 (411558)
- 22 8 and 21 (454)
- 23 9 or 22 (652)
- 24 limit 23 to (english or french) (648)
- 25 24 and 7 (10)
- 26 24 not 25 (638)

### ***Stage 3. Identification of relevant studies and selection of the data***

Based on the eligibility criteria, titles and abstracts were selected independently by two reviewers (VK, IV). Then, full text copies were examined for final inclusion. Differences in the coding were resolved by consensus or referred to a third reviewer (PP). Kappa scores were calculated to estimate inter-reviewer reliability.<sup>9</sup>

The data were extracted from each study by two researchers independently (VK, IV) and comprised:

- characteristics of the study participants (diagnosis, mean age, sex, cognitive function score, comorbidity, sample size);
- characteristics of intervention (main characteristics and other components, type of CM – individual versus team CM, involved healthcare professionals);
- design of the study (RCT, NRS, quantitative descriptive and qualitative studies) and methods;
- context of implementation (e.g., home-care program);

- outcomes from quantitative studies (e.g., neuropsychiatric and behavioural symptoms). Estimated outcomes in the included intervention studies were categorized and coded as “positive” (effect was significant) or “no effect” (no effect or non-significant).
- findings of qualitative studies (all specific themes relevant to CM implementation barriers).

#### ***Stage 4. Appraisal of the quality of included studies***

The quality of the studies was assessed independently by two reviewers (VK, PP) using the Mixed Methods Appraisal Tool (MMAT)<sup>10, 11</sup> that was validated and has been designed for the critical appraisal of studies with diverse designs.<sup>11</sup> The tool demonstrated a good reliability: the consistency of the global quality score between reviewers (intra-class correlation) is 0.72 pre- and 0.94 post-discussion.<sup>11</sup>

Inter-rater reliability was calculated based on weighted kappa.<sup>12</sup> Studies of lower quality were not excluded from the synthesis, as our primary objective was to gain knowledge on dementia CM and highlight main aspects that must be addressed in future research. However, we performed a sensitivity analysis to assess the impact of lower-quality studies (with a score of 0 and 1) on the results.

#### ***Stage 5. Synthesis of included studies***

A sequential explanatory synthesis design developed by Thomas *et al.* was used<sup>13</sup> to integrate qualitative evidence with quantitative findings: a quantitative synthesis was followed by a qualitative synthesis, and then the two were integrated (the results of the qualitative synthesis were used to explain the results of the quantitative synthesis).

##### ***Phase 1. Quantitative synthesis***

We identified the key outcomes of the studies. While this review is based on a detailed definition of CM,<sup>6</sup> a meta-analysis was not possible due to the heterogeneity of CM implementation (CM performed either by a team or individual CM; different background of healthcare professionals involved in dementia CM; addition of other components to CM such as reminiscence therapy, cognitive stimulation; focus on anticholinesterase inhibitors prescription).

However, to evaluate the magnitude of the positive outcomes we calculated the effect size. To obtain the mean, the Cohen method was used:  $Effect\ size = |m_1 - m_2| / s$ , where  $m_1$  and  $m_2$  are the means of the intervention and control groups, respectively, and  $s$  is the pooled standard deviation.<sup>12</sup> The effect size formula was applied to obtain the proportions:  $Effect\ size = |Phi_1 - Phi_2|$ , where  $Phi_1 = 2 \times \text{Arcsin} \sqrt{P_1}$  and  $Phi_2 = 2 \times \text{Arcsin} \sqrt{P_2}$  and  $P_1$  and  $P_2$  are the proportions of the intervention and control groups, respectively. The effect size formula was used to determine the odds ratio:  $Effect\ size = \ln \times Odds\ Ratio \times \sqrt{3/\pi}$ . The Cohen's scale was used to interpret the effect size:  $< 0.2$  = a weak effect;  $0.2$  to  $0.5$  = a small effect;  $0.5$  to  $0.8$  = an intermediate effect;  $> 0.8$  = a large or significant effect.<sup>12</sup>

Furthermore, we developed three main groups of composite outcomes: clinical outcomes (including behavioural symptoms, cognition, depression, functional status, perceived health, quality of life, mortality), service use (including nursing home, hospital and emergency department admission, length of hospital stay), and outcomes for caregivers (including depression, burden, strain, quality of life, perceived health). They were dichotomized as either "no effect" (score 0) (no positive outcomes in the group) or positive (score 1) (at least one positive outcome in the group). The results of RCTs and non-randomized studies (NRSs) were analyzed and presented separately, as the Cochrane Collaboration strongly recommends against inferences derived from the integration of RCTS and NRS statistical results.<sup>14, 15</sup>



### *Phase 2. Qualitative synthesis*

Grol *et al.*<sup>16</sup> recently underscored the potential role played by barriers to implementation in influencing outcomes, so we identified barriers to CM implementation in intervention and non-intervention studies and assigned each study to one of the following categories based on the classification developed by Chaudoir *et al.*:<sup>17</sup> barriers at the level of (i) the *organization* (aspects of the organization in which the innovation is implemented; e.g., organizations that misunderstand the case manager role), (ii) the *provider* (characteristics of the individual provider implementing the innovation; e.g., lack of training), and (iii) the *innovation* (aspects of the implemented innovation; e.g., a short engagement period). As one of the main characteristics of CM, we evaluated CM intensity using the method developed by Pacala *et al.*,<sup>18</sup> previously applied to CM by Somme *et al.*<sup>19</sup>

### *Phase 3. Integration of results from quantitative and qualitative syntheses*

*We followed a 2-step process to integrate results of the quantitative and qualitative syntheses.* First, we identified whether the studies (RCTs and NRSs) had addressed barriers to implementation by matching the Phase 2 results with Phase 1 findings (cross-study synthesis).<sup>13</sup> This analysis was performed by two reviewers independently (VK, IV) with calculation of kappa scores to estimate inter-reviewer reliability.<sup>9</sup>

Second, we applied the Configurational Comparative Method<sup>20</sup> to build “barrier-outcome” configurations (Boolean algebra). This identifies patterns in the relationships between barriers (addressed/non-addressed) to implementation (“conditions”) and outcomes.<sup>20</sup> The method was applied to RCTs only. It postulates that it is necessary for a certain condition or combination of conditions to be present (e.g., CM intensity, duration of the intervention) for an outcome to occur (e.g., fewer hospitalizations). To build “barrier-

outcome” configurations, we grouped studies that shared a given outcome (positive or “no effect”) and we searched for their shared conditions (addressed or non-addressed barriers). We determined whether addressing one barrier was sufficient to result in a positive outcome. When this was not the case in some studies (the technical term is “remainder”, and we use the lay term “outlier” in the method section to avoid technical jargon), we searched for (i) other addressed barriers, the combination of which could lead to positive outcome, or (ii) other factors that could explain the mismatch of “barrier-outcome” configurations.

## References

1. Popay J. *Moving beyond effectiveness in evidence synthesis: Methodological issues in the synthesis of diverse sources of evidence*. London: National Institute for Health and Clinical Excellence; 2006.
2. Harden A. *Mixed-Methods Systematic Reviews: Integrating Quantitative and Qualitative Findings*. National Center for the Dissemination of Disability Research (NCDDR), Department of Education’s Office of Special Education and Rehabilitative Services (OSERS); 2010.
3. Pluye P, Hong QN. Combining the Power of Stories and the Power of Numbers: Mixed Methods Research and Mixed Studies Reviews. *Annu Rev Public Health*. 2013.
4. Moher D, Liberati A, Tetzlaff J, Altman DG. Preferred reporting items for systematic reviews and meta-analyses: the PRISMA statement. *BMJ*. 2009;339:b2535.
5. WHO. *The ICD-10 Classification of Mental and Behavioural Disorders. Diagnostic criteria for research 1993*.

6. Case Management Society of America. [cited 2013 October 10]; Available from: <http://www.cmsa.org>.
7. Weiss ME. Case management as a tool for clinical integration. *Adv Pract Nurs Q*. 1998;4(1):9-15.
8. Canadian Institutes of Health Research. Communit-based primary health care. 2014 [cited 2014 February 3]; Available from: <http://www.cihr.ca/e/43626.html>.
9. Gwet KL. Computing inter-rater reliability and its variance in the presence of high agreement. *Br J Math Stat Psychol*. 2008;61(Pt 1):29-48.
10. Pluye P, Gagnon MP, Griffiths F, Johnson-Lafleur J. A scoring system for appraising mixed methods research, and concomitantly appraising qualitative, quantitative and mixed methods primary studies in Mixed Studies Reviews. *Int J Nurs Stud*. 2009;46(4):529-46.
11. Pace R, Pluye P, Bartlett G, Macaulay AC, Salsberg J, Jagosh J, et al. Testing the reliability and efficiency of the pilot Mixed Methods Appraisal Tool (MMAT) for systematic mixed studies review. *Int J Nurs Stud*. 2012;49(1):47-53.
12. Cohen J. A power primer. *Psychol Bull*. 1992;112(1):155-9.
13. Thomas J, Harden A, Oakley A, Oliver S, Sutcliffe K, Rees R, et al. Integrating qualitative research with trials in systematic reviews. *BMJ*. 2004;328(7446):1010-2.
14. Henry D, Moxey A, O'Connell D, editors. *Agreement between randomized and non-randomized studies - the effects of bias and confounding*. Proceedings: 9th Annual Cochrane Colloquium; 2001 Oct 9-13; Lyon, France.
15. Reeves BC, Higgins JPT, Ramsay C, Shea B, Tugwell P, Wells GA. An introduction to methodological issues when including non-randomised studies in systematic reviews on the effects of interventions. *Res Synth Methods*. 2013;4(1):1-11.

16. Grol RP, Bosch MC, Hulscher ME, Eccles MP, Wensing M. Planning and studying improvement in patient care: the use of theoretical perspectives. *Milbank Q.* 2007;85(1):93-138.
17. Chaudoir SR, Dugan AG, Barr CH. Measuring factors affecting implementation of health innovations: a systematic review of structural, organizational, provider, patient, and innovation level measures. *Implement Sci.* 2013;8:22.
18. Pacala JT, Boulton C, Hepburn KW, Kane RA, Kane RL, Malone JK, et al. Case management of older adults in health maintenance organizations. *J Am Geriatr Soc.* 1995;43(5):538-42.
19. Somme D, Trouve H, Drame M, Gagnon D, Couturier Y, Saint-Jean O. Analysis of case management programs for patients with dementia: a systematic review. *Alzheimers Dement.* 2012;8(5):426-36.
20. Rihoux B, Ragin C. *Configurational comparative methods: Qualitative Comparative Analysis (QCA) and related techniques:* Sage; 2009.

## Appendix 2. Details on CM intensity

### Assessment of CM intensity in selected intervention studies

| ID #        | CM intensity |
|-------------|--------------|
| <b>RCTs</b> |              |
| 16          | 12           |
| 17          | 12           |
| 20          | 5            |
| 24          | 11           |
| 26          | 11           |
| 31          | 11           |
| 32          | 10           |
| 52          | 12           |
| 55          | 11           |
| 62          | 10           |
| 63          | 12           |
| 64          | 12           |
| 66          | 10           |
| 71          | 12           |
| 95          | 8            |
| 25          | 8            |
| 57          | 9            |
| 60          | 12           |
| 61          | 12           |
| 69          | 8            |

|                                                                                                                                                                                                                                                                                                                                                                                                                                                                                                                                                                                                                                                                                                                                                                                                                                                                                          |
|------------------------------------------------------------------------------------------------------------------------------------------------------------------------------------------------------------------------------------------------------------------------------------------------------------------------------------------------------------------------------------------------------------------------------------------------------------------------------------------------------------------------------------------------------------------------------------------------------------------------------------------------------------------------------------------------------------------------------------------------------------------------------------------------------------------------------------------------------------------------------------------|
| <p>Criteria used for CM intensity assessment:</p> <ol style="list-style-type: none"> <li>1. Each manager works with &lt; 60 clients (caseload)</li> <li>2. Spends at least 50% of his/her time face-to-face with clients</li> <li>3. Does the initial eligibility assessment him/herself</li> <li>4. Personally communicates with PCP (and his/her team)</li> <li>5. Organizes multidisciplinary team meetings</li> <li>6. Puts in place the services provided by the organization that employs him/her</li> <li>7. Puts in place the services that the client pays for directly</li> <li>8. Helps the client make decisions regarding care</li> <li>9. Puts in place the services that an organization other than the one that employs him/her pays for</li> <li>10. Helps the client express decisions</li> <li>11. Participates in educating clients about health problems</li> </ol> |
|------------------------------------------------------------------------------------------------------------------------------------------------------------------------------------------------------------------------------------------------------------------------------------------------------------------------------------------------------------------------------------------------------------------------------------------------------------------------------------------------------------------------------------------------------------------------------------------------------------------------------------------------------------------------------------------------------------------------------------------------------------------------------------------------------------------------------------------------------------------------------------------|

| NRS |    |
|-----|----|
| 72  | 8  |
| 73  | 11 |
| 75  | 12 |
| 76  | 10 |
| 77  | 13 |
| 74  | 12 |

\* - based on the method developed by Pacala *et al.* 50 (score  $\geq 11$  - high CM intensity)

|     |                                                                              |
|-----|------------------------------------------------------------------------------|
| 12. | Provides advice to individuals (social work)                                 |
| 13. | Provides advice to families (social work)                                    |
| 14. | Meets with the client regularly                                              |
| 15. | Monitors the client's situation via home visits                              |
| 16. | Monitors the client's situation by having him/her come in for a consultation |
| 17. | Works with clients being institutionalized                                   |
| 18. | Works with clients during hospitalization                                    |

### Appendix 3. Details on quantitative studies

#### (non-randomised and quantitative descriptive)

**Table 1** Characteristics of Included Descriptive Studies

| Study, region                                   | Population                                                                                     | Sample size | Context of CM implementation                                            | Main characteristics of the CM intervention                                                                                                                                  | Type of CM/Healthcare professionals involved in CM                                   |
|-------------------------------------------------|------------------------------------------------------------------------------------------------|-------------|-------------------------------------------------------------------------|------------------------------------------------------------------------------------------------------------------------------------------------------------------------------|--------------------------------------------------------------------------------------|
| Verkade, 2010/<br>the Netherlands <sup>12</sup> | Experts in CM                                                                                  | 30          | -                                                                       | -                                                                                                                                                                            | -                                                                                    |
| Ghatak,<br>2011/USA <sup>78</sup>               | Diagnosis: dementia<br>Mean age: 75<br>Sex: 60% of females<br>Cognitive function: not reported | 237         | Home-care program delivered by the outpatient department of specialised | - analysis of cognitive deficit;<br>- assessment of the competency;<br>- liaison with available resources;<br>- development of a care strategy;<br>- training of caregivers. | Team CM;<br>Case manager: nurse;<br>Other healthcare professionals:<br>psychologist, |

**Table 2** Clinical outcomes in Non-Randomised studies

|                                         |                                                                                                                                |                  |                                                                                                               |                                                                                                                                                                                                                                                                                                               |                                                                                             |     |           |
|-----------------------------------------|--------------------------------------------------------------------------------------------------------------------------------|------------------|---------------------------------------------------------------------------------------------------------------|---------------------------------------------------------------------------------------------------------------------------------------------------------------------------------------------------------------------------------------------------------------------------------------------------------------|---------------------------------------------------------------------------------------------|-----|-----------|
|                                         | Comorbidity: not reported                                                                                                      |                  | community center                                                                                              |                                                                                                                                                                                                                                                                                                               | psychiatrist, neurologist, geriatrician;<br>Role of specialists: not reported.              |     |           |
| Jedenius, 2008/Sweden <sup>79, 80</sup> | Diagnosis: dementia<br>Mean age: 78.3<br>Sex: 59.6% of females<br>Cognitive function (MMSE): 21.8<br>Comorbidity: not reported | 160-257 per year | Home-care program delivered by primary care practice                                                          | - collection of the medical information;<br>- support of the patient-caregiver dyad;<br>- care planning.                                                                                                                                                                                                      | Team CM;<br>Case manager: registered dementia nurse;<br>Other healthcare professionals: FP. |     |           |
| Judge, 2011/USA <sup>81</sup>           | Diagnosis: dementia<br>Mean age: 80<br>Sex: 5.4% of females<br>Cognitive function: not reported<br>Comorbidity: not reported   | 93               | Home-care program delivered by the Alzheimer Association in partnership with Veterans Affairs medical centers | - telephone-based multi-dimensional assessment;<br>- regular follow-up'<br>- in-person conference to review and discuss the results;<br>- development of specific goals;<br>- disease-related education and information provision;<br>- coaching and emotional support;<br>- assistance with support service. | Team CM;<br>Case manager: social worker;<br>Other healthcare professionals: FP.             |     |           |
| # ID                                    | Clinical outcomes                                                                                                              |                  |                                                                                                               |                                                                                                                                                                                                                                                                                                               |                                                                                             |     |           |
|                                         | Behavioural/ psychological symptoms                                                                                            | Depression       | Cognition                                                                                                     | ADL/ IADL                                                                                                                                                                                                                                                                                                     | Perceived health                                                                            | QoL | Mortality |

|    |   |   |   |   |  |  |
|----|---|---|---|---|--|--|
| 72 |   |   | 1 |   |  |  |
| 73 | 0 | 0 |   |   |  |  |
| 75 |   |   | 0 | 0 |  |  |
| 76 | 0 |   | 0 | 1 |  |  |

0 – no effect on outcome ( $p>0.5$ ); 1 - positive effect on outcome ( $p\leq 0.5$ );

ADL/IADL – activities of daily living/instrumental activities; QoL – quality of life.

**Table 3** Outcomes of service use in Non-Randomised studies

| ID # | Service use |     |     |    |
|------|-------------|-----|-----|----|
|      | HR          | NHP | LOS | ED |
| 72   |             | 1   |     |    |
| 73   | 0           | 0   | 0   |    |
| 75   | 0           |     | 0   | 0  |
| 77   | 0           | 0   |     |    |

0 – no effect on outcome ( $p>0.5$ ); 1 - positive effect on outcome ( $p\leq 0.5$ );

HR – hospitalisation rate; NHP – nursing home placement; LOS – length of hospital stay; ED - emergency department admission.

**Table 4** Caregivers outcomes in Non-Randomised studies

| ID # | Caregivers outcomes |            |        |        |     |
|------|---------------------|------------|--------|--------|-----|
|      | Burden              | Depression | Strain | Health | QoL |
| 72   |                     | 0          |        |        |     |
| 73   | 1                   | 0          |        |        |     |
| 76   |                     |            | 0      |        | 0   |



0 – no effect on outcome ( $p>0.5$ ); 1 - positive effect on outcome ( $p\leq 0.5$ );

QoL – Quality of Life

**Table 5** Satisfaction of the participants in Non-Randomised studies

| ID #          | Satisfaction of caregivers | Satisfaction of healthcare professionals |
|---------------|----------------------------|------------------------------------------|
| <sup>74</sup> | 1                          | 0 <sup>#</sup>                           |

0 – no effect on outcome ( $p>0.5$ ); 1 - positive effect on outcome ( $p\leq 0.5$ ).

**Table 6** Other outcomes in Non-Randomised studies

| ID #          | Adherence to dementia guidelines | Medication management |
|---------------|----------------------------------|-----------------------|
| <sup>72</sup> |                                  | 1                     |
| <sup>74</sup> | 1                                |                       |

0 – no effect on outcome ( $<70\%$ ); 1 - positive effect on outcome ( $\geq 70\%$ )

## Appendix 4: Cross-study synthesis

**Table 1** Cross-study synthesis matrix of RCTs

| ID # | Barriers at the level of innovation |                     |                                |                         | Barriers at the level of organization |                        |                                     |                           | Barriers at the level of provider | Composite outcomes |             |                        |
|------|-------------------------------------|---------------------|--------------------------------|-------------------------|---------------------------------------|------------------------|-------------------------------------|---------------------------|-----------------------------------|--------------------|-------------|------------------------|
|      | Restricted inclusion criteria       | Low intensity of CM | Short duration of intervention | Short engagement period | Inadequate communication              | Lack of CM integration | Absence of case manager co-location | Turnover of case managers | Lack of training in geriatrics    | Clinical outcomes  | Service use | Outcomes of caregivers |
| 16   | 0                                   | 1                   | 1                              | 0                       | 1                                     | 1                      | 1                                   | 0                         | 1                                 | 1                  | 0           | 1                      |
| 17   | 0                                   | 1                   | 1                              | 0                       | 1                                     | 0                      | 1                                   | 0                         | 1                                 | 1                  | N/E         | 0                      |
| 20   | 0                                   | 0                   | 1                              | 0                       | 0                                     | 0                      | 0                                   | 0                         | 0                                 | 0                  | 0           | 1                      |
| 24   | 0                                   | 1                   | 1                              | 1                       | 1                                     | 0                      | 0                                   | 0                         | 0                                 | 1                  | 1           | 1                      |
| 25   | 0                                   | 0                   | 0                              | 0                       | 0                                     | 0                      | 0                                   | 0                         | 0                                 | N/E                | 0           | 0                      |
| 26   | 0                                   | 1                   | 1                              | 0                       | 1                                     | 1                      | 1                                   | 0                         | 0                                 | 1                  | 1           | 1                      |
| 31   | 0                                   | 0                   | 0                              | 0                       | 1                                     | 0                      | 1                                   | 0                         | 1                                 | 0                  | N/E         | 1                      |
| 32   | 0                                   | 0                   | 1                              | 0                       | 1                                     | 0                      | 0                                   | 0                         | 1                                 | 0                  | N/E         | 1                      |
| 52   | 0                                   | 1                   | 1                              | 0                       | 1                                     | 1                      | 1                                   | 0                         | 0                                 | 1                  | 1           | 1                      |
| 55   | 1                                   | 0                   | 1                              | 0                       | 0                                     | 0                      | 0                                   | 0                         | 0                                 | 0                  | 0           | 0                      |
| 57   | 1                                   | 0                   | 0                              | 0                       | 1                                     | 0                      | 1                                   | 0                         | 0                                 | N/E                | 0           | N/E                    |
| 60   | 0                                   | 1                   | 1                              | 0                       | 1                                     | 0                      | 0                                   | 0                         | 1                                 | N/E                | 0           | N/E                    |
| 61   | 0                                   | 1                   | 1                              | 0                       | 1                                     | 0                      | 0                                   | 0                         | 1                                 | N/E                | 0           | N/E                    |
| 62   | 0                                   | 1                   | 0                              | 0                       | 1                                     | 0                      | 0                                   | 0                         | 1                                 | 1                  | 0           | 1                      |
| 63   | 0                                   | 1                   | 0                              | 0                       | 1                                     | 1                      | 1                                   | 0                         | 1                                 | 1                  | N/E         | 1                      |

| ID #          | Barriers at the level of innovation |                     |                                |                         | Barriers at the level of organization |                        |                                     |                           | Barriers at the level of provider | Composite outcomes |             |                        |
|---------------|-------------------------------------|---------------------|--------------------------------|-------------------------|---------------------------------------|------------------------|-------------------------------------|---------------------------|-----------------------------------|--------------------|-------------|------------------------|
|               | Restricted inclusion criteria       | Low intensity of CM | Short duration of intervention | Short engagement period | Inadequate communication              | Lack of CM integration | Absence of case manager co-location | Turnover of case managers | Lack of training in geriatrics    | Clinical outcomes  | Service use | Outcomes of caregivers |
| <sup>64</sup> | 0                                   | 1                   | 1                              | 0                       | 0                                     | 0                      | 0                                   | 0                         | 1                                 | 0                  | N/E         | 0                      |
| <sup>66</sup> | 0                                   | 0                   | 0                              | 0                       | 0                                     | 0                      | 0                                   | 0                         | 1                                 | 0                  | 0           | 0                      |
| <sup>69</sup> | 0                                   | 0                   | 1                              | 0                       | 0                                     | 1                      | 1                                   | 0                         | 0                                 | 0                  | 1           | 1                      |
| <sup>71</sup> | 0                                   | 1                   | 1                              | 0                       | 0                                     | 0                      | 0                                   | 0                         | 1                                 | 1                  | 1           | 0                      |
| <sup>95</sup> | 0                                   | 0                   | 1                              | 0                       | 0                                     | 0                      | 0                                   | 0                         | 0                                 | 0                  | 0           | 0                      |

In the section of barriers: 0 – non-addressed barrier, 1 - addressed barrier

In the section of composite outcomes: 0 – negative outcome and 1 – positive outcome, N/E – non-estimated outcome

**Table 2** Cross-study synthesis matrix of NRS

| ID # | Barriers at the level of innovation |                     |                                |                         | Barriers at the level of organization |                        |                                     |                           | Barriers at the level of provider |
|------|-------------------------------------|---------------------|--------------------------------|-------------------------|---------------------------------------|------------------------|-------------------------------------|---------------------------|-----------------------------------|
|      | Restricted inclusion criteria       | Low intensity of CM | Short duration of intervention | Short engagement period | Inadequate communication              | Lack of CM integration | Absence of case manager co-location | Turnover of case managers | Lack of training in geriatrics    |

| ID #          | Barriers at the level of innovation |                     |                                |                         | Barriers at the level of organization |                        |                                     |                           | Barriers at the level of provider |
|---------------|-------------------------------------|---------------------|--------------------------------|-------------------------|---------------------------------------|------------------------|-------------------------------------|---------------------------|-----------------------------------|
|               | Restricted inclusion criteria       | Low intensity of CM | Short duration of intervention | Short engagement period | Inadequate communication              | Lack of CM integration | Absence of case manager co-location | Turnover of case managers | Lack of training in geriatrics    |
| <sup>72</sup> | 0                                   | 0                   | 1                              | 0                       | 1                                     | 1                      | 1                                   | 0                         | 1                                 |
| <sup>73</sup> | 1                                   | 0                   | 1                              | 0                       | 0                                     | 0                      | 1                                   | 0                         | 0                                 |
| <sup>74</sup> | 0                                   | 1                   | 0                              | 0                       | 1                                     | 0                      | 0                                   | 0                         | 1                                 |
| <sup>75</sup> | 0                                   | 1                   | 1                              | 0                       | 0                                     | 0                      | 0                                   | 0                         | 0                                 |
| <sup>76</sup> | 1                                   | 0                   | 1                              | 0                       | 0                                     | 0                      | 0                                   | 0                         | 1                                 |
| <sup>77</sup> | 0                                   | 1                   | 0                              | 0                       | 1                                     | 0                      | 1                                   | 0                         | 1                                 |

0 – non-addressed barrier, 1 - addressed barrier

**Table 3** Barrier-Outcome Matching

| Composite outcomes | Barriers                                                                                              |                                                                                  |
|--------------------|-------------------------------------------------------------------------------------------------------|----------------------------------------------------------------------------------|
|                    | Addressed                                                                                             | Non-addressed                                                                    |
| Positive           | Total: 12 studies<br>RCTs <sup>16, 17, 24, 26, 31, 32, 52, 62, 63, 69, 71</sup><br>NRSs <sup>72</sup> | Total: 1 study<br>RCT <sup>57</sup>                                              |
| Negative           | Total: 5 studies<br>RCTs <sup>60, 61</sup><br>NRSs <sup>73, 76, 77</sup>                              | Total: 7 studies<br>RCTs <sup>18, 25, 55, 64, 66, 95</sup><br>NRSs <sup>75</sup> |

RCT- randomized clinical trial; NRS – non-randomized study

| <b>Supplemental Table 1. Characteristics of Included Randomized Controlled Trials of Case Management Implementation</b>                                      |                                                               |                        |                        |                                                                  |                                                                                                                                                                                                                                                                                                                                                                                                                                                  |                                                                                                                                                          |
|--------------------------------------------------------------------------------------------------------------------------------------------------------------|---------------------------------------------------------------|------------------------|------------------------|------------------------------------------------------------------|--------------------------------------------------------------------------------------------------------------------------------------------------------------------------------------------------------------------------------------------------------------------------------------------------------------------------------------------------------------------------------------------------------------------------------------------------|----------------------------------------------------------------------------------------------------------------------------------------------------------|
| <b>First Author, Year<br/>Country</b>                                                                                                                        | <b>Diagnosis and<br/>Comorbidity (if<br/>Reported)</b>        | <b>Sample<br/>Size</b> | <b>Mean<br/>Age, y</b> | <b>Context of<br/>Implementation</b>                             | <b>Main Intervention Characteristics</b>                                                                                                                                                                                                                                                                                                                                                                                                         | <b>Case Management Type<br/>and Health Care<br/>Professionals Involved</b>                                                                               |
| Callahan, 2006 <sup>12</sup><br>United States                                                                                                                | Dementia (moderate)<br>Mean chronic<br>disease score =<br>8.0 | 153                    | 77.4                   | Home care<br>program<br>delivered by<br>primary care<br>practice | Development of individualized care<br>plan for the patient-caregiver dyad<br>Prescription of anticholinesterase<br>inhibitors and memantine <sup>a</sup><br>Regular assessment of patients'<br>behavior and memory<br>Weekly review of care and<br>adherence to guidelines by<br>multidisciplinary team <sup>a</sup><br>Monitoring of health condition and<br>communication of health care<br>professionals via Web-based<br>system <sup>a</sup> | Team case management<br>Family physician,<br>geriatrician, geriatric<br>psychiatrist,<br>psychologist, geriatric<br>nurse practitioner (case<br>manager) |
| Vickrey, 2006 <sup>13</sup><br>Chodosh, 2006, <sup>49</sup><br>2012 <sup>50</sup><br>Duru, 2009 <sup>55</sup><br>Connor, 2008 <sup>54</sup><br>United States | Dementia (mild)<br>Mean comorbidity<br>index = 2.7            | 408                    | 80.1                   | Home care<br>program<br>delivered by<br>primary care<br>practice | Problem list development with further<br>elaborated care plan including<br>guidelines for caregiver<br>Regular reassessment of the<br>patient's condition<br>Liaison of the patient to support<br>services by case manager<br>Monitoring of health condition and<br>communication of health care<br>professionals via Web-based<br>system <sup>a</sup>                                                                                           | Team case management<br>Family physician, social<br>worker (case manager)                                                                                |
| Miller, 1999 <sup>17</sup><br>Newcomer, 1999 <sup>15,16</sup>                                                                                                | Dementia (moderate)<br>cerebrovascular                        | 8,095                  | 78.9                   | Home care<br>program                                             | Liaison of the patient to support<br>services by case manager                                                                                                                                                                                                                                                                                                                                                                                    | Individual case<br>management                                                                                                                            |

|                                                                                                      |                                                                                                |    |      |                                                                                                                   |                                                                                                                                                                                                                                                                               |                                                                                                                     |
|------------------------------------------------------------------------------------------------------|------------------------------------------------------------------------------------------------|----|------|-------------------------------------------------------------------------------------------------------------------|-------------------------------------------------------------------------------------------------------------------------------------------------------------------------------------------------------------------------------------------------------------------------------|---------------------------------------------------------------------------------------------------------------------|
| Yordi, 1997 <sup>18</sup><br>Shelton, 2001 <sup>19</sup><br>Fox, 2000 <sup>20</sup><br>United States | diseases (40.3%),<br>diabetes (22.4%),<br>degenerative<br>nervous system<br>conditions (16.8%) |    |      | delivered by<br>Medicare                                                                                          | Psychological support to caregiver<br>No data on referral to physician                                                                                                                                                                                                        | Nurse, social worker,<br>mental health worker,<br>gerontology worker<br>(case managers across<br>different sites)   |
| Clark, 2004 <sup>48</sup><br>Bass, 2003 <sup>21</sup><br>United States                               | Dementia and<br>cognitive<br>impairment                                                        | 89 | 76.4 | Home care<br>program<br>delivered by<br>Alzheimer<br>Association in<br>collaboration<br>with Kaiser<br>Permanente | Specially trained staff of the<br>Alzheimer's Association initiated<br>care consultation<br>Structured assessment and care plan<br>development for the patient-<br>caregiver dyad<br>Regular follow-up and reassessment<br>No data on referral to physician                   | Individual case<br>management<br>Social worker (case<br>manager)                                                    |
| Fortinsky, 2009 <sup>22</sup><br>United States                                                       | Dementia                                                                                       | 84 | 81.7 | Home care<br>program<br>delivered by<br>Alzheimer<br>Association                                                  | Educational material for caregivers<br>about the course of disease, legal<br>and financial issues, community<br>services<br>Regular contacts by care consultant<br>to assess patient's condition<br>Elaborated plan action for caregiver;<br>No data on referral to physician | Individual case<br>management<br>Social worker (case<br>manager)                                                    |
| Chien, 2008 <sup>23</sup><br>China                                                                   | Dementia (moderate)                                                                            | 88 | 67   | Home care<br>program<br>delivered by<br>community<br>dementia<br>centers                                          | Structured caregiver's needs<br>assessment<br>Care plan development for the dyad<br>including educational training<br>No data on referral to physician                                                                                                                        | Individual case<br>management<br>Nurse (case manager)                                                               |
| Dias, 2008 <sup>28</sup><br>India                                                                    | Dementia (mild to<br>moderate)                                                                 | 81 | 79.4 | Home care<br>program<br>delivered by<br>community<br>health service                                               | Education of caregivers about the<br>disease<br>Emotional support to caregivers<br>Improvement of caregivers' skills<br>Referral to support groups<br>No data on referral to physician                                                                                        | Team case management<br>Psychiatrist home care<br>advisor (case manager<br>with no social or<br>medical background) |
| Schoenmakers,<br>2010 <sup>29</sup><br>Belgium                                                       | Cognitive impairment<br>(moderate)<br>Incontinence (33%)                                       | 62 | -    | Home care<br>program<br>delivered by<br>primary care<br>practice                                                  | Guidance of the caregiver in<br>organizing home care<br>Exploring problematic home care<br>situations<br>Monthly telephone call with the<br>caregiver<br>Regular home follow-up<br>Permanent reach for advice<br>No data on referral to physician                             | Team case management<br>Family physician, primary<br>care professional with a<br>bachelor degree (case<br>manager)  |
| Chien, 2010 <sup>48</sup><br>China                                                                   | Dementia (moderate)                                                                            | 92 | 68.1 | Home care<br>program                                                                                              | Generation of the important problem<br>areas                                                                                                                                                                                                                                  | Team case management<br>Psychiatrist, social                                                                        |

|                                                 |                                                                                                                                     |     |            |                                                                                    |                                                                                                                                                                                                                                   |                                                                                                                                                             |
|-------------------------------------------------|-------------------------------------------------------------------------------------------------------------------------------------|-----|------------|------------------------------------------------------------------------------------|-----------------------------------------------------------------------------------------------------------------------------------------------------------------------------------------------------------------------------------|-------------------------------------------------------------------------------------------------------------------------------------------------------------|
|                                                 |                                                                                                                                     |     |            | delivered by community dementia centers                                            | Individualized education and support program<br>Improvement of home care and finance skills<br>Close collaboration of case manager with psychiatrist                                                                              | worker, nurse (case manager)                                                                                                                                |
| Chu, 2000 <sup>51</sup><br>Canada               | Dementia (mild)                                                                                                                     | 78  | 78%<br>>75 | Home care program delivered by community-based center                              | Action plan development for the dyad<br>Assistance with support service<br>Provision of coping strategies<br>No data on referral to physician                                                                                     | Individual case management<br>Social worker (case manager)                                                                                                  |
| Clarkson, 2006 <sup>53</sup><br>United Kingdom  | Cognitive impairment (mild)<br>Heart failure (11%),<br>osteoarthritis (25%),<br>incontinence (17%),<br>cardiovascular disease (12%) | 256 | 82         | Home care program delivered in the community care setting                          | Screening for eligible health problems<br>Assessment and arranging the care plan<br>Monitoring and regular review<br>Presenting to the panel for consideration for home care admission <sup>a</sup>                               | Team case management<br>Geriatrician, old age psychiatrist, social worker (case manager)                                                                    |
| Eloniemi-Sulkava, 200 <sup>56</sup><br>Finland  | Dementia (moderate)                                                                                                                 | 100 | 78.8       | Home care program delivered by community health service (public health department) | Training courses for the patient-caregiver dyad about the disease and coping strategies<br>Assistance with support service<br>Systematic counseling;<br>Regular follow-up<br>Consultation with specialists in complex cases       | Team case management/<br>Geriatrician, registered nurse specialized in public health (case manager)                                                         |
| Eloniemi-Sulkava, 2009 <sup>57</sup><br>Finland | Dementia (moderate)<br>Mean comorbidity index = 2.4                                                                                 | 125 | 78         | Home care program delivered by community health service (public health department) | Support plan development in cooperation with the dyad<br>Training courses for the patient-caregiver dyad about the disease and coping strategies<br>Assistance with support service<br>Systematic counseling<br>Regular follow-up | Team case management<br>Geriatrician, public health registered nurse with advanced practice education and special education in dementia care (case manager) |
| Enguidanos, 2006 <sup>58</sup><br>United States | Cognitive impairment (moderate)                                                                                                     | 452 | 79         | Home care program delivered by Kaiser Permanente                                   | Identification of health needs<br>Assistance with support service<br>In-home assessment and ongoing coordination<br>Coordinated work of case manager with the Kaiser Permanente health care professionals                         | Team case management<br>Geriatrician, social worker and nurse practitioner (case managers)                                                                  |
| Hinchliffe, 1995 <sup>59</sup>                  | Dementia                                                                                                                            | 40  | 81         | Home care                                                                          | Medication management                                                                                                                                                                                                             | Team case management                                                                                                                                        |

|                                                                          |                                                            |     |       |                                                             |                                                                                                                                                                                                                                                                                                                                                                                                           |                                                                                                                                      |
|--------------------------------------------------------------------------|------------------------------------------------------------|-----|-------|-------------------------------------------------------------|-----------------------------------------------------------------------------------------------------------------------------------------------------------------------------------------------------------------------------------------------------------------------------------------------------------------------------------------------------------------------------------------------------------|--------------------------------------------------------------------------------------------------------------------------------------|
| United Kingdom                                                           |                                                            |     |       | program delivered in the community care setting             | (prescription of neuroleptics, benzodiazepines) <sup>a</sup><br>Reminiscence therapy <sup>a</sup><br>Encouragement of regular toileting <sup>a</sup><br>Sleep hygiene <sup>a</sup><br>Coordination of the service (eg, referral to day centers, respite care)<br>Assistance with the financial issues (eg, tax exemption of carriers)<br>Education of caregivers<br>Referral to the Alzheimer Association | Psychiatrist, clinical psychologist, community psychiatric nurse, social worker, occupational therapist, psychiatrist (case manager) |
| Jansen, 2005, <sup>61</sup><br>2011 <sup>60</sup><br>The Netherlands     | Cognitive impairment (mild)<br>With >1 chronic disease 81% | 99  | 82.1  | Primary care practice delivered home care program           | In-home assessment<br>Elaborated care plan development for the patient-caregiver dyad<br>Liaison to support service<br>Regular communication of case manager with family physician to inform about patient's health condition <sup>a</sup><br>Referral to specialists, if needed                                                                                                                          | Team case management<br>Family physician, district nurse specialized in geriatric care (case manager)                                |
| Lam, 2009 <sup>62</sup><br>China                                         | Dementia (moderate)                                        | 102 | 78.6  | Home care program delivered by the community-based center   | In-home assessment and initial home visits<br>Home-based program on cognitive stimulation <sup>a</sup><br>Assistance with support service<br>No data on referral to physician                                                                                                                                                                                                                             | Individual case management<br>Occupational therapist (case manager)                                                                  |
| Laurant, 2004 <sup>63</sup><br>The Netherlands                           | Dementia                                                   | ... | ...   | Home care program delivered by primary care practice        | Assessment of the patient's health and home situation<br>Education of patients<br>Coordination of the care and assistance with community health services and other health care professionals                                                                                                                                                                                                              | Team case management<br>Family physician, nurse (case manager)                                                                       |
| Mittelman, 2004, <sup>65,66</sup><br>2006 <sup>64</sup><br>United States | Dementia                                                   | 406 | 74.31 | Home care program delivered by the Alzheimer disease center | Baseline assessment<br>Individual and family counseling sessions tailored to each caregiver's situation<br>Ad hoc telephone counseling<br>Ongoing emotional support and education<br>Referral for auxiliary help, financial planning and management of patient behavioral problems                                                                                                                        | Individual case management<br>Social worker (case manager)                                                                           |



|                                                                                                    |                                                                                                                                  |     |      |                                                           |                                                                                                                                                                                                                                                              |                                                                |
|----------------------------------------------------------------------------------------------------|----------------------------------------------------------------------------------------------------------------------------------|-----|------|-----------------------------------------------------------|--------------------------------------------------------------------------------------------------------------------------------------------------------------------------------------------------------------------------------------------------------------|----------------------------------------------------------------|
|                                                                                                    |                                                                                                                                  |     |      |                                                           | No data on referral to physician                                                                                                                                                                                                                             |                                                                |
| Parsons, 2012 <sup>67</sup><br>New Zealand                                                         | Cognitive impairment (moderate)<br>Vision problems (71%), hearing problems (56.8%), communication problems (11.5%), falls (32%). | 351 | 80.8 | Home care program delivered by primary care practice      | Liaison of the patient to support and rehabilitation services<br>Maintenance and coordination of care<br>Health prevention plan development by family physician<br>Regular reassessment<br>Regularly scheduled meetings of case manager and family physician | Team case management<br>Family physician, nurse (case manager) |
| Wright, 2001 <sup>91</sup><br>United States                                                        | Dementia (moderate)<br>Mean number of coexisting medical conditions = 4.0                                                        | 93  | 77.8 | Home care program delivered by the community-based center | Problem identification and care plan development<br>Caregiver support program<br>Assistance with support service<br>No data on referral to physician                                                                                                         | Individual case management<br>Nurse (case manager)             |
| <sup>a</sup> Components of case management intervention are different across the included studies. |                                                                                                                                  |     |      |                                                           |                                                                                                                                                                                                                                                              |                                                                |

**Supplemental Table 2. Characteristics of Included Nonrandomized Studies of Case Management Implementation**

| <b>First Author, Year, Country</b>            | <b>Diagnosis and Comorbidity (if Reported)</b> | <b>Sample Size</b> | <b>Mean Age, y</b> | <b>Context of Implementation</b>                            | <b>Main Intervention Characteristics</b>                                                                                                                                                                                                          | <b>Case Management Type and Health Care Professionals Involved</b>                                            |
|-----------------------------------------------|------------------------------------------------|--------------------|--------------------|-------------------------------------------------------------|---------------------------------------------------------------------------------------------------------------------------------------------------------------------------------------------------------------------------------------------------|---------------------------------------------------------------------------------------------------------------|
| Aupperle, 2000 <sup>68</sup><br>United States | Dementia (moderate)                            | 39                 | 80.4               | Home care program delivered by primary care practice        | Comprehensive neuropsychiatric evaluation<br>Education about the disease<br>Review of caregiver coping skills<br>Behavioral management<br>Assistance with community resources<br>Long-term care planning, as well as legal and financial planning | Team case management<br>Geriatric psychiatrist, nurse or social worker (case managers)                        |
| Challis, 2002 <sup>69</sup><br>United Kingdom | Dementia                                       | 43                 | 80.4               | Home care program delivered by community mental health team | Planning and coordination of service delivery<br>Work with the small number of service users<br>Regular reassessment<br>Close collaboration of health care professionals through referral system                                                  | Team case management<br>Specialist mental health team, social worker or clinical psychologist (case managers) |
| Cherry, 2004 <sup>70</sup><br>United States   | Dementia (moderate)                            | 83                 | 80                 | Home care program delivered by primary care practice        | Comprehensive geriatric assessment<br>Regular follow-up<br>Assessment of family support adequacy<br>Defining goals and development of treatment plan<br>Assistance with support service through referrals<br>Education of caregiver-patient dyads | Individual case management<br>Social worker (case manager)                                                    |
| Hammer, 2001 <sup>71</sup><br>United States   | Cognitive impairment (64%)                     | 25                 | ...                | Home care program delivered in the community care setting   | Comprehensive assessment of the patient<br>Assistance with support, rehabilitation services and resources<br>Regular follow-up<br>Assistance with primary care physician finding                                                                  | Individual case management<br>Nurse, gerontologic clinical nurse, social worker (case managers)               |
| Specht, 2009 <sup>72</sup><br>United States   | Cognitive impairment (mild)                    | 252                | 82.4               | Home care program delivered by case                         | Patient-caregiver dyad assessment<br>Individualized care plan development<br>Assistance with support service<br>Regular home visits and reassessment                                                                                              | Individual case management<br>Nurse specialized in dementia care (case manager)                               |

|                                                           |                     |    |    | management system                                           |                                                                                                                                                                                                      |                                                                                                                                                                                 |
|-----------------------------------------------------------|---------------------|----|----|-------------------------------------------------------------|------------------------------------------------------------------------------------------------------------------------------------------------------------------------------------------------------|---------------------------------------------------------------------------------------------------------------------------------------------------------------------------------|
| Stevenson, 2006 <sup>73</sup><br>Scotland, United Kingdom | Dementia (moderate) | 65 | 83 | Home care program delivered by community mental health team | Initial in-home assessment<br>Care plan development<br>Regular follow-up and readjustment<br>Case conferences to discuss the findings<br>Assistance with access to services (day care, respite care) | Team case management<br>Psychogeriatrician, family physician, support workers, occupational therapist, social worker and F grade registered mental health nurse (case managers) |

<sup>a</sup> Components of case management intervention are different across the included studies.

| <b>Supplemental Table 3. Barriers to Implementing Case Management</b>                                                                                                                                                                                                                                                                                                            |                       |
|----------------------------------------------------------------------------------------------------------------------------------------------------------------------------------------------------------------------------------------------------------------------------------------------------------------------------------------------------------------------------------|-----------------------|
| <b>Main Categories of the Barriers</b>                                                                                                                                                                                                                                                                                                                                           | <b>No. of Studies</b> |
| <b>Barriers at the level of organization</b>                                                                                                                                                                                                                                                                                                                                     |                       |
| Misunderstanding of the case manager's role by other health care professionals <sup>9,60,78-80,83-88,90</sup><br>Reluctance to recognize the importance of the case manager in mobilization of resources in psychosocial support of the patient-caregiver dyad, extension of physician's role in terms of preventive care, reduction of time spent by a physician on the patient | 12                    |
| Insufficient communication between health care professionals <sup>9,29,78-90</sup><br>Lack of clear system communication between primary and secondary care for timely consultation of complex cases, regular meetings to discuss cases                                                                                                                                          | 15                    |
| Large caseload <sup>7,9,80,90</sup><br>More than 50 patients per full-time case manager                                                                                                                                                                                                                                                                                          | 3                     |
| Lack of case management integration in the current health care system <sup>9,88,90</sup><br>Absence of the full integration of case management in the primary care facility<br>Case management was not considered to be a part of the primary care facility                                                                                                                      | 3                     |
| Absence of case management and family physician co-location <sup>82,84,86</sup><br>Family physician and case manager work in different locations                                                                                                                                                                                                                                 | 3                     |
| Time constraints <sup>7,9,80,83,87,88</sup><br>Insufficient time to complete comprehensive assessment of the patient-caregiver dyad                                                                                                                                                                                                                                              | 5                     |
| Turnover of case managements <sup>9,22,86</sup><br>Lack of stability in human resources among case managements                                                                                                                                                                                                                                                                   | 3                     |
| <b>Barriers at the level of the clinician</b>                                                                                                                                                                                                                                                                                                                                    |                       |
| Lack of involvement of family physicians in dementia care <sup>73,85,86</sup><br>Reluctance to work with patients with dementia due to the lack of adequate knowledge in geriatrics (eg, use of cognitive tests, detection of early symptoms of dementia)                                                                                                                        | 3                     |
| Lack of training in geriatrics among health care professionals <sup>9,28,79,80,82,83,86-90</sup><br>Insufficient specific knowledge of dementia and other geriatric conditions among case managers<br>Lack of adequate knowledge about available resources for patients with dementia and caregivers (eg, Alzheimer Association)                                                 | 11                    |
| <b>Barriers at the level of innovation</b>                                                                                                                                                                                                                                                                                                                                       |                       |
| Restricted inclusion criteria <sup>15,29,86,90</sup><br>Only patients with a confirmed dementia diagnosis eligible for case management<br>Age-centered criteria of recruitment vs problem-centered                                                                                                                                                                               | 4                     |
| Low intensity of case management <sup>9,29,62,65</sup>                                                                                                                                                                                                                                                                                                                           | 4                     |

|                                                                                                                                                                                                                                   |   |
|-----------------------------------------------------------------------------------------------------------------------------------------------------------------------------------------------------------------------------------|---|
| <p>Infrequent follow-up<br/> Intervention of low fidelity provided by case managers (eg, reluctance to follow the guidelines/care plan)<br/> Absence of regular meeting of case manager with family physician and specialists</p> |   |
| <p>Short duration of case management intervention<sup>28,91</sup><br/> Intervention lasts less than 12 months</p>                                                                                                                 | 2 |
| <p>Short engagement period<sup>70,83,86,88</sup><br/> Insufficient time to develop trust between the health care professionals</p>                                                                                                | 4 |

| Supplemental Table 4. Dichotomized Data and Conditions |                            |                                             |                                            |                                       |                                                            |                                     |                                               |                                                                                                                                                                               |
|--------------------------------------------------------|----------------------------|---------------------------------------------|--------------------------------------------|---------------------------------------|------------------------------------------------------------|-------------------------------------|-----------------------------------------------|-------------------------------------------------------------------------------------------------------------------------------------------------------------------------------|
| Type of Composite Outcome (No. of Studies)             | Study Reference No.        | Addressed Barriers to Implementation        |                                            |                                       |                                                            |                                     |                                               | Conclusion                                                                                                                                                                    |
|                                                        |                            | High-Intensity Case Management <sup>a</sup> | Long Duration of Intervention <sup>b</sup> | Sufficient Communication <sup>c</sup> | Case Manager and Family Physician Co-location <sup>d</sup> | Training in Geriatrics <sup>e</sup> | Other (Least Addressed) Barriers <sup>f</sup> |                                                                                                                                                                               |
| Clinical outcomes                                      |                            |                                             |                                            |                                       |                                                            |                                     |                                               |                                                                                                                                                                               |
| Positive (n = 7)                                       | 12, 13, 21, 23, 48, 59, 67 | 1 <sup>g</sup>                              | 1 or 0                                     | 1 or 0                                | 1 or 0                                                     | 1 or 0                              | 0 or 1                                        | High intensity is sufficient for positive clinical outcomes <sup>g</sup>                                                                                                      |
| No effect (n = 7)                                      | 15, 28, 29, 51, 62, 65, 91 | 0 <sup>g</sup>                              | 1 or 0                                     | 1 or 0                                | 1 or 0                                                     | 1 or 0                              | 0 or 1                                        |                                                                                                                                                                               |
| Positive (n = 1)                                       | 48                         | 0                                           | 0                                          | 1                                     | 0                                                          | 1                                   | 0 or 1                                        | Sufficient communication and training in geriatrics may lead to positive clinical outcomes                                                                                    |
| Outlier: No effect (n = 1)                             | 60                         | 1                                           | 1                                          | 0                                     | 0                                                          | 1                                   | 0 or 1                                        | Other factors:<br>Low intervention fidelity<br>Not aimed at and adapted to caregivers with more severe distress and problems<br>Insensitive tools for detecting small changes |
| Service use                                            |                            |                                             |                                            |                                       |                                                            |                                     |                                               |                                                                                                                                                                               |
| Positive (n = 4)                                       | 21, 23, 58, 67             | 1 <sup>g</sup>                              | 1 or 0                                     | 1 or 0                                | 1 or 0                                                     | 1 or 0                              | 0 or 1                                        | High intensity is sufficient to optimize service use <sup>g</sup>                                                                                                             |
| No effect (n = 6)                                      | 15, 22, 51, 53,            | 0 <sup>g</sup>                              | 1 or 0                                     | 1 or 0                                | 1 or 0                                                     | 1 or 0                              | 0 or 1                                        |                                                                                                                                                                               |

**Supplemental Table 4. Dichotomized Data and Conditions**

| Type of Composite Outcome (No. of Studies) | Study Reference No.            | Addressed Barriers to Implementation        |                                            |                                       |                                                            |                                     |                                               | Conclusion                                                                                                                                  |
|--------------------------------------------|--------------------------------|---------------------------------------------|--------------------------------------------|---------------------------------------|------------------------------------------------------------|-------------------------------------|-----------------------------------------------|---------------------------------------------------------------------------------------------------------------------------------------------|
|                                            |                                | High-Intensity Case Management <sup>a</sup> | Long Duration of Intervention <sup>b</sup> | Sufficient Communication <sup>c</sup> | Case Manager and Family Physician Co-location <sup>d</sup> | Training in Geriatrics <sup>e</sup> | Other (Least Addressed) Barriers <sup>f</sup> |                                                                                                                                             |
|                                            | 58, 91                         |                                             |                                            |                                       |                                                            |                                     |                                               |                                                                                                                                             |
| Positive (n = 1)                           | 65                             | 0                                           | 1                                          | 0                                     | 1                                                          | 0                                   | 0 or 1                                        | Long duration of the intervention and co-location of case manager may lead to better service use                                            |
| Outlier: No effect (n = 3)                 | 12                             | 1                                           | 1                                          | 1                                     | 1                                                          | 1                                   | 0 or 1                                        | Other factors:<br>Selection and contamination bias<br>Low statistical power, no cluster analysis<br>Focus on neuropsychiatric symptoms only |
|                                            | 56, 57                         | 1                                           | 1                                          | 1                                     | 0                                                          | 1                                   | 0 or 1                                        | Other factors:<br>Contamination bias<br>Low statistical power                                                                               |
| <b>Outcomes for caregivers</b>             |                                |                                             |                                            |                                       |                                                            |                                     |                                               |                                                                                                                                             |
| Positive (n = 8)                           | 12, 21, 23, 28, 29, 48, 58, 59 | 1 or 0                                      | 1 or 0                                     | 1 <sup>g</sup>                        | 1 or 0                                                     | 1 or 0                              | 0 or 1                                        | Communication is sufficient to produce positive outcomes for caregivers <sup>g</sup>                                                        |
| No effect (n = 6)                          | 22, 51, 60, 62, 67, 91         | 1 or 0                                      | 1 or 0                                     | 0 <sup>g</sup>                        | 1 or 0                                                     | 1 or 0                              | 0 or 1                                        |                                                                                                                                             |
| Positive (n = 2)                           | 15,65                          | 1 or 0                                      | 1                                          | 0                                     | 1 or 0                                                     | 1 or 0                              | 0 or 1                                        | Long duration of the intervention may lead to positive                                                                                      |

**Supplemental Table 4. Dichotomized Data and Conditions**

| Type of Composite Outcome (No. of Studies) | Study Reference No. | Addressed Barriers to Implementation        |                                            |                                       |                                                            |                                     |                                               | Conclusion                                                                                                                         |
|--------------------------------------------|---------------------|---------------------------------------------|--------------------------------------------|---------------------------------------|------------------------------------------------------------|-------------------------------------|-----------------------------------------------|------------------------------------------------------------------------------------------------------------------------------------|
|                                            |                     | High-Intensity Case Management <sup>a</sup> | Long Duration of Intervention <sup>b</sup> | Sufficient Communication <sup>c</sup> | Case Manager and Family Physician Co-location <sup>d</sup> | Training in Geriatrics <sup>e</sup> | Other (Least Addressed) Barriers <sup>f</sup> |                                                                                                                                    |
|                                            |                     |                                             |                                            |                                       |                                                            |                                     |                                               | outcomes for caregivers                                                                                                            |
| Outlier: No effect (n = 1)                 | 13                  | 1                                           | 1                                          | 1                                     | 1                                                          | 1                                   | 0 or 1                                        | Other factors: Only 1 clinical outcome for caregivers (quality of life) was assessed, and it was high at baseline (ceiling effect) |

Note: 1 = barrier addressed; 0 = barrier not addressed; 1 or 0 = either addressed or not.

<sup>a</sup> Based on the Pacala's score,  $\geq 12$  = high case management intensity<sup>46</sup> (Supplemental Appendixes 2 and 6).

<sup>b</sup> Intervention lasts  $\geq 12$  months.

<sup>c</sup> Regular meeting of case manager with support team (family physician or/and specialists) or family physician with specialists to discuss complex cases; Web-based tracking system to monitor the health condition, care plan, and communicate the results to the care team.

<sup>d</sup> Location of case manager and family physician at the same health care setting.

<sup>e</sup> In team case management: training in geriatrics of family physicians in team case management (use of cognitive screening test, detection of early symptoms of dementia, prescription of cholinesterase inhibitors and knowledge of their side effects, application of dementia treatment protocol); in individual and team case management: training of case managers in management of dementia and other geriatric conditions such as incontinence, frequent falls, depression (clinical symptoms, nonpharmacological care plan), mobilization of available support services (Alzheimer Association, rehabilitation centers, psychological support of caregivers); case managers with degree in dementia care.

<sup>f</sup> Other (the least addressed) barriers: lack of case management integration into the current health care system, restricted inclusion criteria, short engagement period.

<sup>g</sup> The most important Boolean configurations.



**Supplemental Table 5. MMAT Quality Appraisal for Studies with Diverse Designs**

| Study Reference No.          | Quality Appraisal |                          |                 |              |               |
|------------------------------|-------------------|--------------------------|-----------------|--------------|---------------|
|                              | Randomization     | Blinding                 | Outcome Data    | Dropout Rate | Overall Score |
| Randomized controlled trials |                   |                          |                 |              |               |
| 12                           | 1                 | 1                        | 0               | 1            | 3             |
| 13                           | 1                 | 1                        | 1               | 0            | 3             |
| 17                           | 0                 | 0                        | 1               | 1            | 2             |
| 21                           | 0                 | 1                        | 1               | 0            | 2             |
| 22                           | 0                 | 1                        | 1               | 0            | 2             |
| 23                           | 0                 | 1                        | 1               | 1            | 3             |
| 28                           | 1                 | 0                        | 1               | 0            | 2             |
| 29                           | 1                 | 1                        | 0               | 1            | 3             |
| 48                           | 1                 | 1                        | 1               | 1            | 4             |
| 51                           | 0                 | 0                        | 1               | 1            | 2             |
| 53                           | 0                 | 0                        | 0               | 0            | 0             |
| 56                           | 1                 | 0                        | 1               | 1            | 3             |
| 57                           | 1                 | 1                        | 1               | 1            | 4             |
| 58                           | 0                 | 0                        | 0               | 0            | 0             |
| 59                           | 1                 | 1                        | 1               | 1            | 4             |
| 60                           | 1                 | 1                        | 1               | 1            | 4             |
| 62                           | 1                 | 1                        | 1               | 1            | 4             |
| 63                           | 1                 | 0                        | 0               | 1            | 2             |
| 65                           | 1                 | 1                        | 1               | 1            | 4             |
| 67                           | 0                 | 1                        | 1               | 1            | 3             |
| 91                           | 0                 | 0                        | 0               | 0            | 0             |
|                              | Selection Bias    | Appropriate Measurements | Compared Groups | Outcome Data | Overall Score |
| Nonrandomized studies        |                   |                          |                 |              |               |
| 68                           | 0                 | 1                        | 1               | 1            | 3             |
| 69                           | 1                 | 1                        | 1               | 1            | 4             |
| 70                           | 0                 | 0                        | 1               | 1            | 2             |
| 71                           | 0                 | 1                        | 0               | 1            | 2             |
| 72                           | 1                 | 1                        | 0               | 1            | 3             |

|                                                                                                                |                       |                            |                |                    |                      |
|----------------------------------------------------------------------------------------------------------------|-----------------------|----------------------------|----------------|--------------------|----------------------|
| 73                                                                                                             | 1                     | 1                          | 1              | 1                  | 4                    |
|                                                                                                                | <b>Source of Data</b> | <b>Methods of Analysis</b> | <b>Context</b> | <b>Reflexivity</b> | <b>Overall Score</b> |
| Qualitative studies                                                                                            |                       |                            |                |                    |                      |
| 78                                                                                                             | 1                     | 1                          | 0              | 1                  | 3                    |
| 79                                                                                                             | 1                     | 1                          | 0              | 0                  | 2                    |
| 81                                                                                                             | 1                     | 1                          | 0              | 0                  | 2                    |
| 82                                                                                                             | 1                     | 1                          | 1              | 0                  | 3                    |
| 83                                                                                                             | 1                     | 1                          | 1              | 1                  | 4                    |
| 84                                                                                                             | 1                     | 1                          | 0              | 0                  | 2                    |
| 85                                                                                                             | 1                     | 0                          | 1              | 0                  | 2                    |
| 86                                                                                                             | 1                     | 1                          | 1              | 0                  | 3                    |
| 87                                                                                                             | 1                     | 1                          | 0              | 0                  | 2                    |
| 88                                                                                                             | 1                     | 1                          | 0              | 0                  | 2                    |
| 89                                                                                                             | 1                     | 0                          | 0              | 0                  | 1                    |
| 90                                                                                                             | 1                     | 1                          | 0              | 0                  | 2                    |
| MMAT = Mixed Methods Appraisal Tool.<br>Note: 1 = criterion met; 0 = criterion not met or unable to determine. |                       |                            |                |                    |                      |
